# Supplementary material for: Immune‐Related Adverse Events by Immune Checkpoint Inhibitors Significantly Predict Durable Efficacy Even in Responders with Advanced Non‐Small Cell Lung Cancer
Source: PubMed Central journal article supplement — Oncologist. 2019 Nov 19;25(4):e679–83. doi: 10.1634/theoncologist.2019-0299 (PMC7160399; doi:10.1634/theoncologist.2019-0299), 2019-11-19

Supplemental Figure for:  
 Immune-related adverse events by immune-checkpoint inhibitors significantly predict durable efficacy even in responders with advanced non-small cell lung cancer  
 Hiroaki Akamatsu et al.

**Supplementary Figure S1.**

Comparison of serum proteins between irAE and non-irAE responders. (a) FGF-2, (b) IP-10, (c) MDC and (d) fold change of MCP-1. Each circle represents the data of individual patient. In FGF-2, one patient with asterisk represents lower value than detectable limit (FGF-2; 13.7 pg/mL).

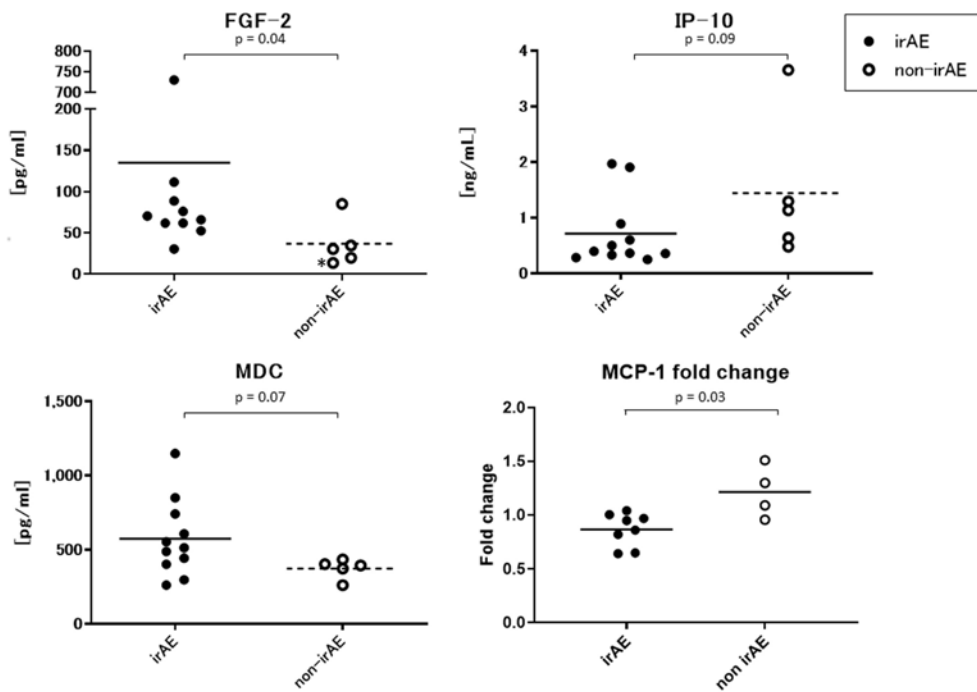

Supplement: ONCO-25-e679-s001.pdf [file ONCO-25-e679-s001.pdf]
