# Supplementary material for: Immune‐Related Adverse Events by Immune Checkpoint Inhibitors Significantly Predict Durable Efficacy Even in Responders with Advanced Non‐Small Cell Lung Cancer
Source: PubMed Central journal article supplement — Oncologist. 2019 Nov 19;25(4):e679–83. doi: 10.1634/theoncologist.2019-0299 (PMC7160399; doi:10.1634/theoncologist.2019-0299), 2019-11-19
Supplement: ONCO-25-e679-s002.pdf [file ONCO-25-e679-s002.pdf]

Supplemental Table for:

Immune-related adverse events by immune-checkpoint inhibitors significantly predict durable efficacy even in responders with advanced non-small cell lung cancer

Hiroaki Akamatsu et al.

**Supplementary Table S1.** Analytes used in this study.

|                |                 |        |          |         |            |
|----------------|-----------------|--------|----------|---------|------------|
| Angiopoietin-2 | BMP-9           | EGF    | Endoglin | EOTAXIN | FGF-2      |
| Flt-3L         | Follistatin     | G-CSF  | GM-CSF   | GRO     | HB-EGF     |
| HGF            | IFN- $\alpha$ 2 | IFN-g  | IL-10    | IL-17   | IL-2       |
| IL-4           | IL-6            | IL-7   | IL-8     | IP-10   | Leptin     |
| MCP-1          | MDC             | MIP-1a | MIP-1b   | PDGF-AA | PDGF-AB/BB |
| PLGF           | RANTES          | sCD40L | TGF-a    | TGF-b1  | TGF-b2     |
| TGF-b3         | TNF-a           | VEGF-A | VEGF-C   | VEGF-D  |            |
